# Supplementary material for: Facile synthesis of β-NaGdF4:Yb/Er@CaF2nanoparticles with enhanced upconversion fluorescence and stability via a sequential growth process
Source: Royal Society of Chemistry journal article supplement (doi:10.1039/c5ce01061f), 2015-01-01
Supplement: c5ce01061f1.pdf [file c5ce01061f1.pdf]

Supporting information

## Facile Synthesis of $\beta$ -NaGdF<sub>4</sub>:Yb/Er@CaF<sub>2</sub> Nanoparticles with Enhanced Upconversion Fluorescence and Stability via a Sequential Growth Process

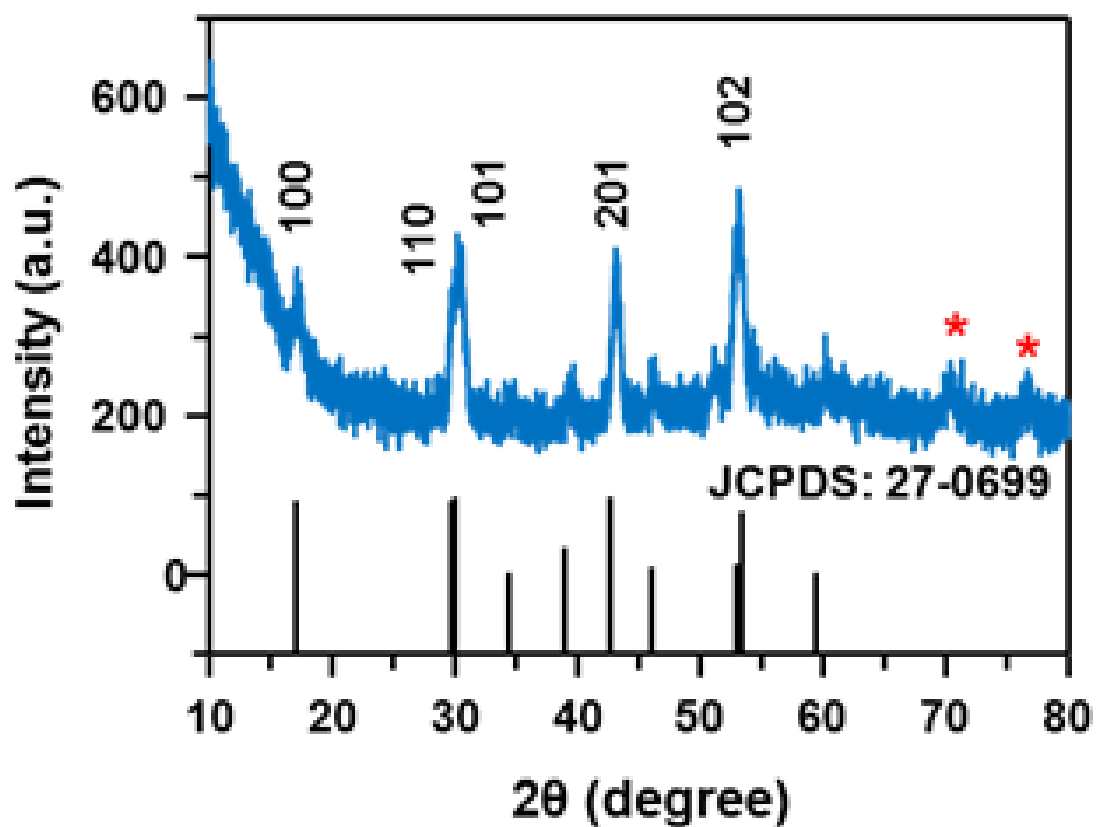

**Fig. S1.** X-ray diffraction (XRD) pattern of NaGdF<sub>4</sub>:Yb/Er@CaF<sub>2</sub> NPs (blue) and standard pure hexagonal phase NaGdF<sub>4</sub> (JCPDS no. 27-0699) (black).

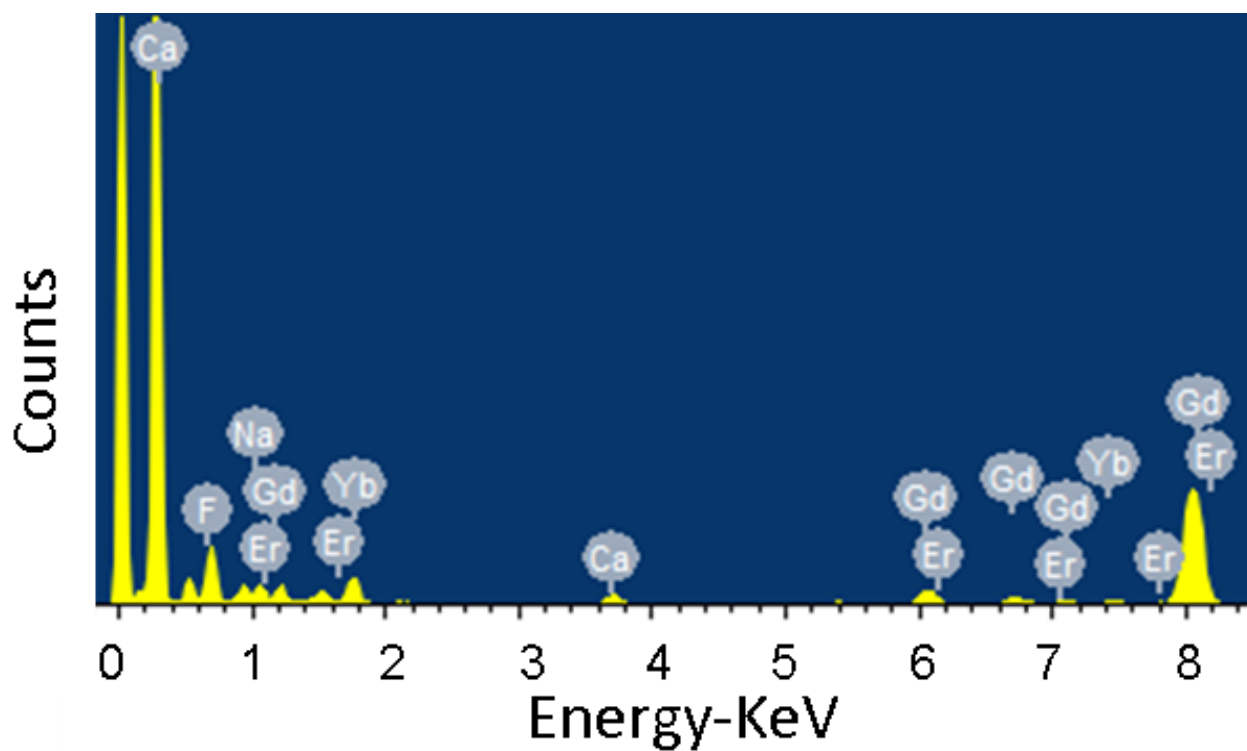

**Fig. S2.** The energy-dispersive X-ray spectroscopy analyses of (a)  $\text{NaGdF}_4:\text{Yb,Er}@CaF_2$  core/shell NPs, revealing the presence of F, Na, Gd, Yb, Er and Ca, illustrating the formation of  $\text{NaGdF}_4:\text{Yb/Er}@CaF_2$  core/shell nanoparticles.

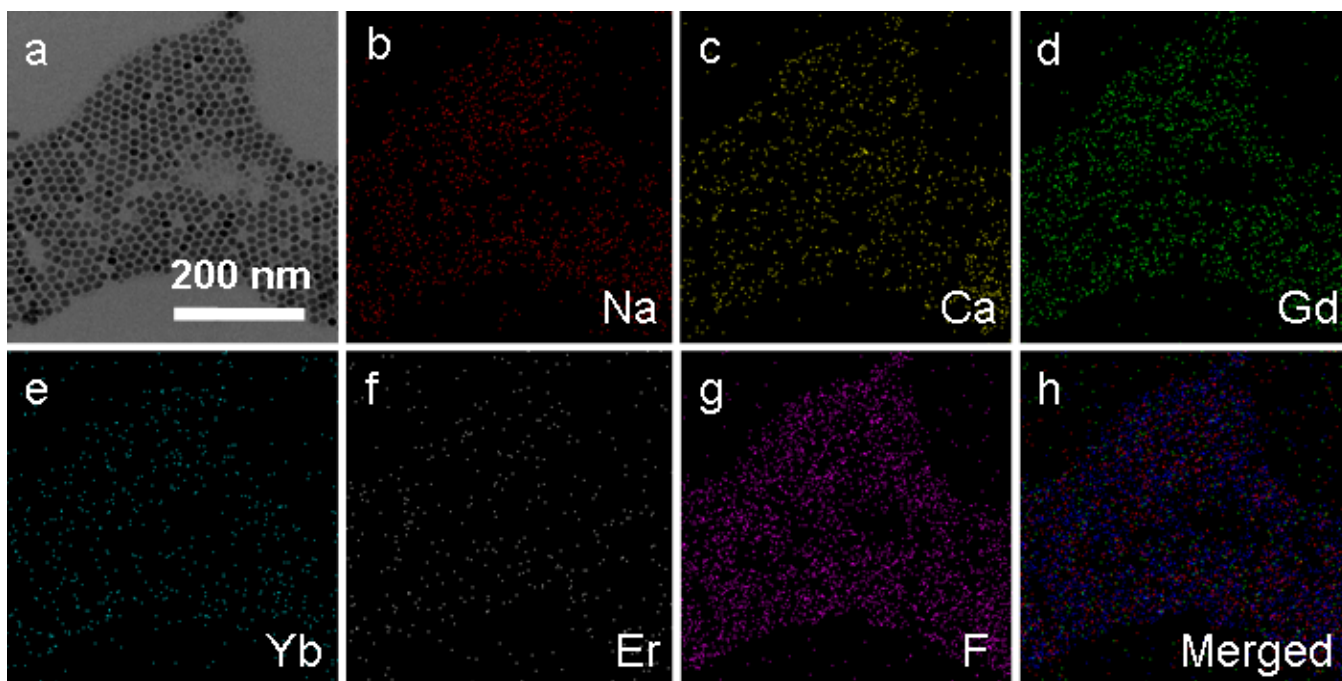

**Fig. S3.** (a) STEM image of  $\text{NaGdF}_4:\text{Yb,Er}@CaF_2$  core-shell NPs; (b -g) Element maps: (b) Na; (c) Ca; (d) Gd; (e) Yb; (f) Er; (g) F and merged images of the all the elements (h).

**Fig. S4.** (a) TEM image of the core NaGdF<sub>4</sub>:Yb/Er NPs; (b-c) TEM images of the core-shell NaGdF<sub>4</sub>:Yb/Er@CaF<sub>2</sub> NPs with different shell thickness obtained from 0.25 mmol RE-OA, 0.125 mmol Ca-OA, 0.0741 g NH<sub>4</sub>F, 0.05 g NaOH at 280 °C (named core-shell-1), and 0.25 mmol RE-OA, 0.25 mmol Ca-OA, 0.0741 g NH<sub>4</sub>F, 0.05 g NaOH at 280 °C (named core-shell-2); (a-c) TEM images of the as-prepared samples demonstrate the different core-shell thickness: (d) 12.16 nm; (e) 12.63 nm; (f) 13.29 nm. (g) HRTEM image and (h-i) dark-field scanning transmission electron microscopy images of the core-shell-1 NaGdF<sub>4</sub>:Yb/Er@CaF<sub>2</sub> nanoparticles.

**Fig. S5.** TEM images of the as-prepared product obtained from different amount of NaOH and other synthetic parameters were kept at same as synthesis of the core-shell-2 NPs : (a) 0.02g; (b) 0.16 g.

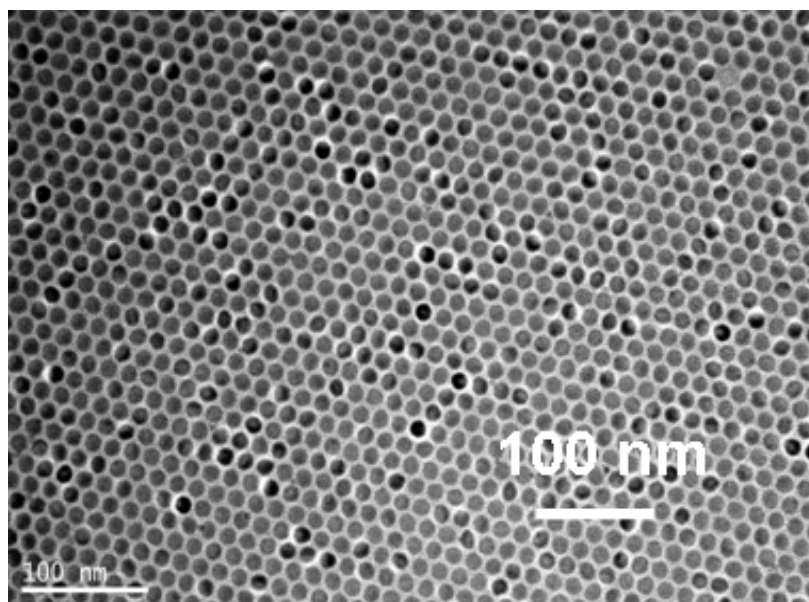

**Fig. S6.** TEM image of the NaGdF<sub>4</sub>:Yb/Er NPs.

**Table S1.** Element composition of the as-prepared NaGdF<sub>4</sub>:Yb,Er@CaF<sub>2</sub> core-shell nanoparticles from EDX analyses.

| Element | Weight% | Atomic% |
|---------|---------|---------|
| F       | 35.13   | 70.27   |
| Na      | 6.90    | 11.41   |
| Ca      | 6.51    | 6.18    |
| Gd      | 38.24   | 9.24    |
| Er      | 0.00    | 0.00    |
| Yb      | 13.21   | 2.90    |
| Totals  | 100.00  |         |
